# Supplementary material for: Fast polysulfide catalytic conversion and self-repairing ability for high loading lithium–sulfur batteries using a permselective coating layer modified separator
Source: Royal Society of Chemistry journal article supplement (doi:10.1039/d1nr04357a), 2021-01-01
Supplement: d1nr04357a1.pdf [file d1nr04357a1.pdf]

## Supporting Information

### **Fast Polysulfides Catalytic Conversion and Self-Repairing Ability for High Loading Lithium-Sulfur Batteries using a Permselective Coating Layer Modified Separator**

Fang-Lei Zeng,<sup>a</sup> Fang Wang,<sup>\*b</sup> Ning Li,<sup>a</sup> Ke-Meng Song,<sup>a</sup> Shi-Ye Chang,<sup>a</sup> Lu Shi,<sup>d</sup> Xin-Yu Zhou,<sup>a</sup> Wei-Kun Wang,<sup>c</sup> Zhao-Qing Jin,<sup>c</sup> An-Bang Wang,<sup>\*c</sup> Ning-Yi Yuan<sup>\*a</sup> and Jian-Ning Ding<sup>a,d</sup>

<sup>a</sup>School of Material Science and Engineering, Jiangsu Collaborative Innovation Center for Photovoltaic Science and Engineering, Jiangsu Province Cultivation base for State Key Laboratory of Photovoltaic Science and Technology, Changzhou University, Changzhou 213164, China.

<sup>b</sup>School of Environmental Engineering and Chemistry, Luoyang institute of Science and Technology, Luoyang, Henan 471023, China.

<sup>c</sup>Military Power Sources Research and Development Center, Research Institute of Chemical Defense, Academy of Military Sciences, Beijing 100191, China.

<sup>d</sup>Institute of Intelligent Flexible Mechatronics, Jiangsu University, Zhenjiang 212013, China.

\*Corresponding authors.

E-mail addresses: wangfang1116@163.com (Fang Wang); wab\_wang2000@126.com (An-Bang Wang); nyuan@cczu.edu.cn (Ning-Yi Yuan)

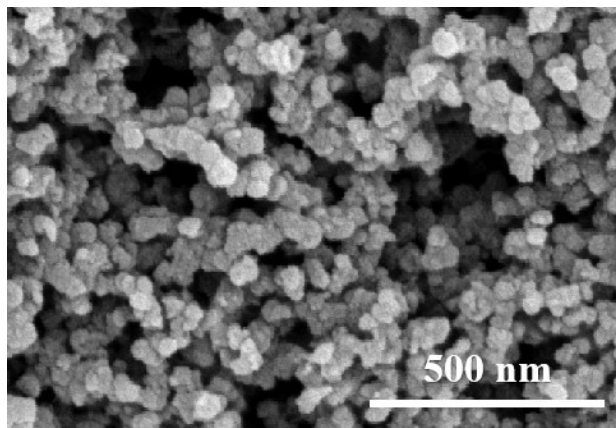

**Fig. S1** SEM images of AB powder

**Table S1** The specific surface areas, pore diameters and pore volumes of AB and ABPS

| Material | BET surface area<br>( $\text{m}^2 \text{g}^{-1}$ ) | Pore diameter<br>(nm) | Pore volume<br>( $\text{mL g}^{-1}$ ) |
|----------|----------------------------------------------------|-----------------------|---------------------------------------|
| AB       | 55.991                                             | 12.355                | 0.203                                 |
| ABPS     | 57.335                                             | 18.399                | 0.252                                 |

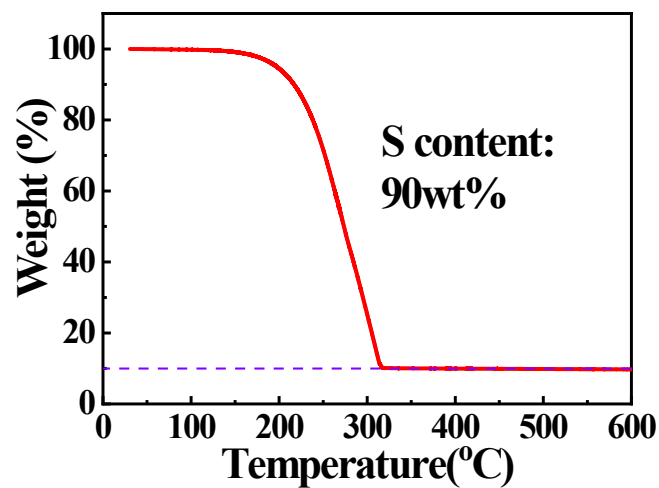

**Fig. S2** The TG curves of CPS/S composites from 50 to 600°C at a heating rate of 10 °C min<sup>-1</sup> under a N<sub>2</sub> atmosphere.

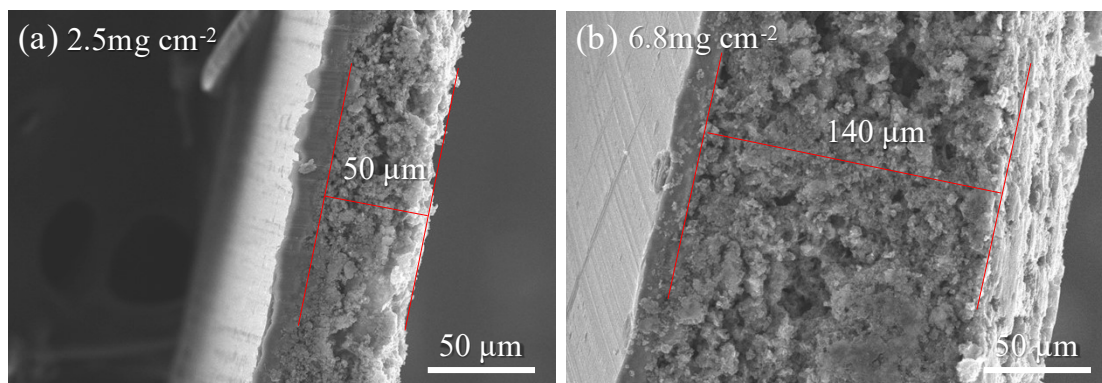

**Fig. S3** The cross section SEM images of the sulfur cathodes with (a) 2.5 mg cm<sup>-2</sup> and (b) 6.8 mg cm<sup>-2</sup>.

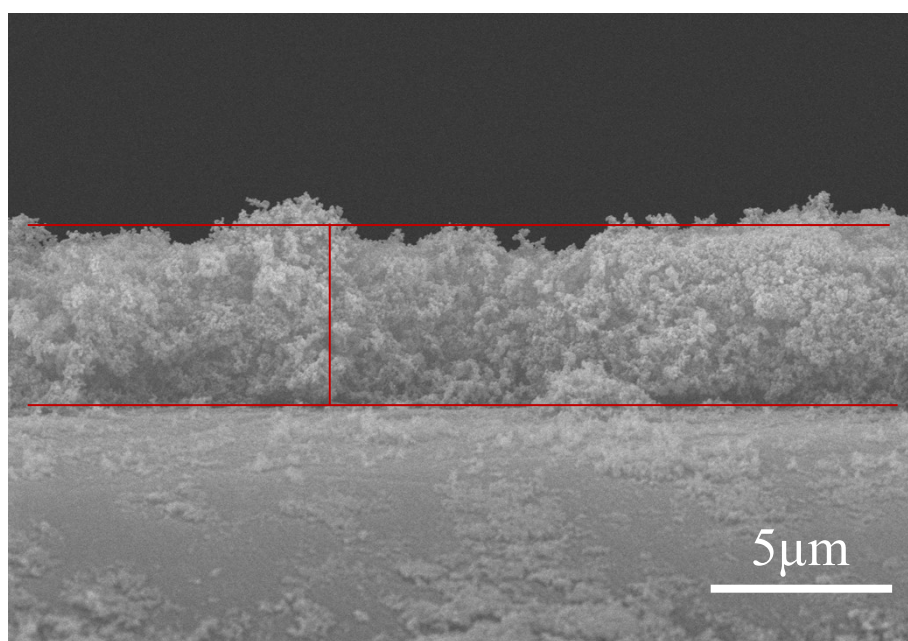

**Fig. S4** The cross section SEM images of the AB modified separator

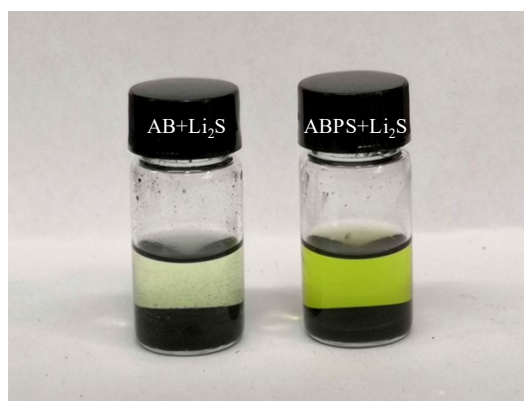

**Fig. S5** Optical observation of Li<sub>2</sub>S reaction with AB and ABPS composite in DOL/DME solution after 2 h.

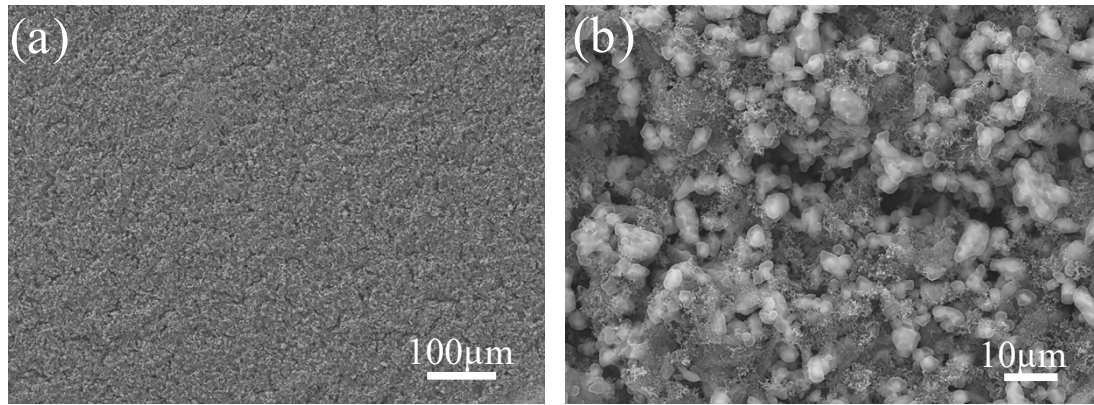

**Fig. S6** The surface morphology images of the as-prepared sulfur electrodes.

**Table S2** Parameters obtained for  $t_{Li^+}$  calculation of the symmetric coin cell.

| Separator                  | $I_s, \mu A$ | $R_b, \Omega$ | $R_f, \Omega$ | $R_0, \Omega$ | $t_{Li^+}$ |
|----------------------------|--------------|---------------|---------------|---------------|------------|
| Pristine Celgard separator | 92.1         | 86.1          | 96.4          | 4.5           | 0.37       |
| ABPS modified separator    | 310.2        | 25.4          | 27.2          | 2.8           | 0.57       |

**Table S3** Characteristics of various high loading sulfur electrodes with or without a novel functional separator reported in the literature.

| Interlayer or Host Material Reference | Thick of the coating layer ( $\mu m$ )               | Mass loading of the coating ( $mg\ cm^{-2}$ ) | S Percentage of Electrode/wit h coating (wt%) | S mass Loading ( $mg\ cm^{-2}$ ) | E/S, $\mu L\ mg^{-1}$ | Cycle Performance $mA\ h\ g^{-1}$ (cycle numbers) | Areal Capacity, $mA\ h\ cm^{-2}$     | Published Date |      |
|---------------------------------------|------------------------------------------------------|-----------------------------------------------|-----------------------------------------------|----------------------------------|-----------------------|---------------------------------------------------|--------------------------------------|----------------|------|
| Functional layers                     | g-C <sub>3</sub> N <sub>4</sub> /CNT <sup>[53]</sup> | 12                                            | 0.45                                          | 57.6/55.6                        | 7.2                   | 6                                                 | 787~633, (0.2C, 120)                 | 5.67~4.56      | 2020 |
|                                       | ACC/MnO <sub>2</sub> <sup>[54]</sup>                 | 20                                            | -                                             | 80/-                             | 5                     | 6.25                                              | 993~712 (0.2C, 300)                  | 4.96~3.56      | 2020 |
|                                       | BFO/GO/AB <sup>[55]</sup>                            | 25                                            | 0.48                                          | 64/60.7                          | 5.6                   | 12                                                | 1016~ 834 (0.1C, 50)                 | 5.1~4.3        | 2020 |
|                                       | LNPO/rGO <sup>[56]</sup>                             | 20                                            | 0.88                                          | 80/71.6                          | 6                     | 8.3                                               | 700~623 (0.3C, 300)                  | 4.2~3.7        | 2020 |
|                                       | FeTaPc@rGO <sup>[57]</sup>                           | 13                                            | 0.23                                          | 68/65.9                          | 5                     | 5                                                 | 1000~800 (0.2C, 200)                 | 5~4            | 2021 |
|                                       | Ce-MOF-2/CNT <sup>[36]</sup>                         | 8                                             | 0.4                                           | 80% for composite/-              | 6                     | 40 (for each cell)                                | 993.5~886.4 (0.1C, 200)              | 5.96~5.32      | 2019 |
|                                       | FeP/HPC <sup>[52]</sup>                              | --                                            | 0.3                                           | 52.5/51.1                        | 5.73                  | 15                                                | 1052.9~982.5 (0.01C, 30)             | 6.03~5.63      | 2021 |
|                                       | CoFeCN@C <sup>[27]</sup>                             | 15                                            | 0.5                                           | 70/65.8                          | 5.5                   | 15                                                | 982~818 (0.1C, 150)                  | 5.4~4.5        | 2021 |
|                                       | Fe/Co/Ni SACs <sup>[58]</sup>                        | 7                                             | 0.1                                           | -/-                              | 4.5                   | 10                                                | 1000~892 (1.0 C, 750)                | 4.5~4.0        | 2019 |
|                                       | Co-N-C/AC <sup>[59]</sup>                            | 7                                             | 0.5                                           | 56/53.1                          | 5.09                  | 10                                                | 1100 (0.2C, 100)                     | 5.6            | 2021 |
| Functional Host Materials             | CoSA-N-C@S <sup>[60]</sup>                           |                                               |                                               | 55.6                             | 4.9                   | 10.4                                              | 1061.7~871.3 (0.2C, 120)             | 4.63~4.21      | 2021 |
|                                       | nO2@rGO/S <sup>[61]</sup>                            |                                               |                                               | 56                               | 4                     | 5                                                 | 748~446 (0.2C, 200)                  | 2.99~1.78      | 2020 |
|                                       | 3D-S@NCoCPC <sup>[37]</sup>                          |                                               |                                               | 62                               | 6.15                  | 4                                                 | 1040~940 (100mA g <sup>-1</sup> , 7) | 6.39~5.78      | 2021 |
|                                       | S@3DVS <sub>4</sub> @RGO <sup>[62]</sup>             |                                               |                                               | 70                               | 5                     | 10                                                | 1116~996 (0.2C, 100)                 | 5.80~4.98      | 2020 |
|                                       |                                                      |                                               |                                               |                                  | 7                     | 10                                                | 1030~853 (0.2C, 100)                 | 7.21~5.97      |      |
|                                       | Fe-Ni/S <sup>[63]</sup>                              |                                               |                                               | 73.1                             | 6.4                   | 8                                                 | 953~797 (0.1C, 100)                  | 6.1~5.1        | 2021 |
|                                       | CNT/CNF                                              |                                               |                                               |                                  | 8.64                  | 7                                                 | 880~400 (0.1C, 200)                  | 6.9~3.45       | 2021 |
|                                       | -polysulfide <sup>[64]</sup>                         |                                               |                                               |                                  | 8.64                  | 4                                                 | 620~0 (0.1C, 100)                    | 5.35~0         |      |
|                                       | S@Co-N/G <sup>[65]</sup>                             |                                               |                                               | 67.5                             | 6                     | 12                                                | 1210~850 (0.2C, 100 )                | 7.26~5.1       | 2019 |
|                                       | G-MgB <sub>2</sub> <sup>[28]</sup>                   |                                               |                                               | 60                               | 9.3                   | 6.5                                               | 850~665 (0.2C, 100)                  | 7.9~6.18       | 2019 |
| FLPT-S <sup>[66]</sup>                |                                                      |                                               | 59                                            | 6.8                              | 8                     | 1120~805 (1/30C, 75 cycles)                       | 7.62~5.48                            | 2019           |      |

|  |                                            |     |      |         |     |   |                                               |           |           |
|--|--------------------------------------------|-----|------|---------|-----|---|-----------------------------------------------|-----------|-----------|
|  | ABPS-coating<br>layer <sup>This work</sup> | 5.5 | 0.12 | 72/69.6 | 6.8 | 4 | 1211~886 (1.03 mA cm <sup>-2</sup> ,<br>170 ) | 8.24~6.03 | This work |
|--|--------------------------------------------|-----|------|---------|-----|---|-----------------------------------------------|-----------|-----------|
